# Supplementary material
Source: HighWire-hosted journal article supplement (https://nutrition.bmj.com/content/3/2/229)
Supplement: inline-supplementary-material-4 [file inline-supplementary-material-4.pdf]

| <b>Supplementary Table 3: Univariable analysis of individual, shift work exposure and workplace environment factors and frequency of wholegrain consumption<sup>a</sup> of participants (n = 1300)</b>                                                                                                                                                                                                                                                                                                                                                                                                                                                                    |                                  |                                     |                  |             |                      |
|---------------------------------------------------------------------------------------------------------------------------------------------------------------------------------------------------------------------------------------------------------------------------------------------------------------------------------------------------------------------------------------------------------------------------------------------------------------------------------------------------------------------------------------------------------------------------------------------------------------------------------------------------------------------------|----------------------------------|-------------------------------------|------------------|-------------|----------------------|
| <b>Variables</b>                                                                                                                                                                                                                                                                                                                                                                                                                                                                                                                                                                                                                                                          | <b>≥1 serv/day<br/>(n = 512)</b> | <b>&lt;1 serv/day<br/>(n = 788)</b> |                  |             |                      |
|                                                                                                                                                                                                                                                                                                                                                                                                                                                                                                                                                                                                                                                                           | <b>n (%)</b>                     | <b>n (%)</b>                        | <b>p-value*</b>  | <b>OR</b>   | <b>95% CI</b>        |
| <b>Gender</b> (ref: Female) Male                                                                                                                                                                                                                                                                                                                                                                                                                                                                                                                                                                                                                                          | 269 (52.5)                       | 403 (51.1)                          | ns               | 1.06        | (0.85 - 1.32)        |
| <b>Age Category<sup>1</sup></b> (ref: 18-34 years)                                                                                                                                                                                                                                                                                                                                                                                                                                                                                                                                                                                                                        |                                  |                                     |                  |             |                      |
| Middle-aged (35-54 years)                                                                                                                                                                                                                                                                                                                                                                                                                                                                                                                                                                                                                                                 | 239 (47.2)                       | 367 (47.2)                          | ns               | 1.15        | (0.90 - 1.47)        |
| Older age (55-65 years)                                                                                                                                                                                                                                                                                                                                                                                                                                                                                                                                                                                                                                                   | 90 (17.8)                        | 97 (12.5)                           | <b>0.004</b>     | <b>1.64</b> | <b>(1.17 - 2.31)</b> |
| <b>BMI<sup>2</sup></b> (ref: Normal)                                                                                                                                                                                                                                                                                                                                                                                                                                                                                                                                                                                                                                      |                                  |                                     |                  |             |                      |
| Overweight/Obese                                                                                                                                                                                                                                                                                                                                                                                                                                                                                                                                                                                                                                                          | 237 (54.0)                       | 339 (52.9)                          | ns               | 1.05        | (0.82 - 1.33)        |
| <b>Socio-economic status<sup>3</sup></b> (ref: ABC1)                                                                                                                                                                                                                                                                                                                                                                                                                                                                                                                                                                                                                      |                                  |                                     |                  |             |                      |
| C2DE                                                                                                                                                                                                                                                                                                                                                                                                                                                                                                                                                                                                                                                                      | 257 (51.8)                       | 387 (51.8)                          | ns               | 1.00        | (0.80 - 1.33)        |
| <b>Occupational Sector</b><br>(ref: Health & Social Work)                                                                                                                                                                                                                                                                                                                                                                                                                                                                                                                                                                                                                 |                                  |                                     |                  |             |                      |
| Accommodation & Food                                                                                                                                                                                                                                                                                                                                                                                                                                                                                                                                                                                                                                                      | 77 (15.0)                        | 141 (17.9)                          | ns               | 0.78        | (0.55 - 1.11)        |
| Retail                                                                                                                                                                                                                                                                                                                                                                                                                                                                                                                                                                                                                                                                    | 69 (13.5)                        | 160 (20.3)                          | <b>0.007</b>     | <b>0.62</b> | <b>(0.43 - 0.88)</b> |
| Manufacturing                                                                                                                                                                                                                                                                                                                                                                                                                                                                                                                                                                                                                                                             | 43 (8.4)                         | 167 (8.5)                           | ns               | 0.92        | (0.59 - 1.42)        |
| Other                                                                                                                                                                                                                                                                                                                                                                                                                                                                                                                                                                                                                                                                     | 177 (34.6)                       | 211 (26.8)                          | ns               | 1.20        | (0.90 - 1.61)        |
| <b>Duration of SW Exposure</b> (ref: <8 yrs)                                                                                                                                                                                                                                                                                                                                                                                                                                                                                                                                                                                                                              |                                  |                                     |                  |             |                      |
| ≥8 years                                                                                                                                                                                                                                                                                                                                                                                                                                                                                                                                                                                                                                                                  | 299 (58.4)                       | 379 (48.1)                          | <b>&lt;0.001</b> | <b>1.52</b> | <b>(1.21 - 1.90)</b> |
| <b>Average Shift Length</b> (ref: <8 hours)                                                                                                                                                                                                                                                                                                                                                                                                                                                                                                                                                                                                                               |                                  |                                     |                  |             |                      |
| 8-11 hours                                                                                                                                                                                                                                                                                                                                                                                                                                                                                                                                                                                                                                                                | 241 (47.1)                       | 381 (48.4)                          | ns               | 1.09        | (0.84 - 1.43)        |
| ≥12 hours                                                                                                                                                                                                                                                                                                                                                                                                                                                                                                                                                                                                                                                                 | 132 (25.8)                       | 167 (21.2)                          | <b>0.049</b>     | <b>1.37</b> | <b>(1.00 - 1.86)</b> |
| <b>Predominant SW Pattern</b> (ref: Days)                                                                                                                                                                                                                                                                                                                                                                                                                                                                                                                                                                                                                                 |                                  |                                     |                  |             |                      |
| Nights                                                                                                                                                                                                                                                                                                                                                                                                                                                                                                                                                                                                                                                                    | 54 (10.5)                        | 110 (14.0)                          | <b>0.007</b>     | <b>0.60</b> | <b>(0.41 - 0.87)</b> |
| Rotating                                                                                                                                                                                                                                                                                                                                                                                                                                                                                                                                                                                                                                                                  | 61 (11.9)                        | 107 (13.6)                          | ns               | 0.70        | (0.48 - 1.00)        |
| Other                                                                                                                                                                                                                                                                                                                                                                                                                                                                                                                                                                                                                                                                     | 190 (37.1)                       | 318 (40.4)                          | <b>0.017</b>     | <b>0.73</b> | <b>(0.57 - 0.94)</b> |
| <b>Food Preparation Facilities</b> (ref: Yes)                                                                                                                                                                                                                                                                                                                                                                                                                                                                                                                                                                                                                             |                                  |                                     |                  |             |                      |
| Not Available at Work                                                                                                                                                                                                                                                                                                                                                                                                                                                                                                                                                                                                                                                     | 248 (48.4)                       | 367 (46.6)                          | ns               | 1.08        | (0.86 - 1.35)        |
| <b>Food Storage Facilities</b> (ref: Yes)                                                                                                                                                                                                                                                                                                                                                                                                                                                                                                                                                                                                                                 |                                  |                                     |                  |             |                      |
| Not Available at Work                                                                                                                                                                                                                                                                                                                                                                                                                                                                                                                                                                                                                                                     | 210 (41.0)                       | 306 (38.8)                          | ns               | 1.10        | (0.87 - 1.37)        |
| <b>Vending Machines</b> (ref: None)                                                                                                                                                                                                                                                                                                                                                                                                                                                                                                                                                                                                                                       |                                  |                                     |                  |             |                      |
| Available at Work                                                                                                                                                                                                                                                                                                                                                                                                                                                                                                                                                                                                                                                         | 133 (26.0)                       | 222 (28.2)                          | ns               | 1.12        | (0.87 - 1.44)        |
| <b>Break Times Adequate<sup>4</sup></b> (ref: Agree)                                                                                                                                                                                                                                                                                                                                                                                                                                                                                                                                                                                                                      |                                  |                                     |                  |             |                      |
| Disagree                                                                                                                                                                                                                                                                                                                                                                                                                                                                                                                                                                                                                                                                  | 138 (31.9)                       | 199 (29.2)                          | ns               | 1.14        | (0.88 - 1.48)        |
| <b>Satisfied with healthy food availability<sup>5</sup></b> (ref: Agree)                                                                                                                                                                                                                                                                                                                                                                                                                                                                                                                                                                                                  |                                  |                                     |                  |             |                      |
| Disagree                                                                                                                                                                                                                                                                                                                                                                                                                                                                                                                                                                                                                                                                  | 140 (37.9)                       | 238 (42.5)                          | ns               | 0.83        | (0.63 - 1.08)        |
| <b>Workplace helps lead a healthy lifestyle<sup>6</sup></b> (ref: Agree)                                                                                                                                                                                                                                                                                                                                                                                                                                                                                                                                                                                                  |                                  |                                     |                  |             |                      |
| Disagree                                                                                                                                                                                                                                                                                                                                                                                                                                                                                                                                                                                                                                                                  | 196 (46.6)                       | 300 (48.9)                          | ns               | 0.91        | (0.71 - 1.17)        |
| <b>Leisure Facilities</b> (ref: Yes)                                                                                                                                                                                                                                                                                                                                                                                                                                                                                                                                                                                                                                      |                                  |                                     |                  |             |                      |
| Not Available at Work                                                                                                                                                                                                                                                                                                                                                                                                                                                                                                                                                                                                                                                     | 462 (90.2)                       | 696 (88.3)                          | ns               | 1.22        | (0.85 - 1.76)        |
| <small>           BMI = Body Mass Index<br/>           Serv = Serving, yrs = years<br/>           *P values &lt;0.05 were deemed significant (denoted in bold font)<br/> <sup>a</sup>According to the Food Safety Authority of Ireland dietary guidelines<sup>16</sup><br/> <sup>b</sup>Valid denominator = 1283<br/> <sup>c</sup>Those categorised as 'Underweight' were excluded (n = 30)<br/>           OR, 95% CI = Odds Ratio, 95% Confidence Interval<br/> <sup>d</sup>Some participants declined to respond (n = 57)<br/> <sup>e</sup>Valid denominator = 1113<br/> <sup>f</sup>Valid denominator = 929<br/> <sup>g</sup>Valid denominator = 1035         </small> |                                  |                                     |                  |             |                      |
